# Supplementary material for: Quantifying Contribution of Atmospheric Circulation to Precipitation Variability and Changes in the U.S. Great Plains and Southwest Using Self Organizing Map – Analogue
Source: Copernicus journal article supplement (doi:10.5194/egusphere-2023-626), 2023-06-07
Supplement: Supplementary file [file egusphere-2023-626-AC1-supplement.pdf]

## Reply to Reviewer's Comments

### Reviewer 1:

Review of: Quantifying Contribution of Atmospheric Circulation to Precipitation Variability and Changes in the U.S. Great Plains and Southwest Using Self Organizing Map – Analogue

#### OVERALL COMMENTS:

This is a really interesting paper. I think this is a valuable contribution. I am a big proponent of the use of classification techniques (and SOMs) in helping to analyze and visualize the complex relationships between atmosphere and surface impacts – and this is an excellent example. However, I have some semi-major and minor comments that I detail below, that I would like the authors to address and consider, prior to publication. Also, this manuscript might need some slight language editing.

#### MAJOR COMMENTS:

I think the dynamic vs. thermodynamic dichotomy is a bit misleading. This is because z500 and IVT are going to have **thermally-related variability inherent to them**, right? While you only explicitly include z500 heights and IVT on each day into the classification, that does not necessarily mean that many/all other environmental variables (e.g. 2m temperature, 850t, 2m dew points, 925winds, SLP, and everything else) are not also 'indirectly' playing a role in classifying a day's weather. That is to say, classification is implicitly wholistic – it categorizes the \*wholistic/synergistic\* environment over a particular time period (herein, a day). While this is not an issue in most research using classification (and is arguably a benefit of using classification in applied research), herein, when you are trying to use classification to de-couple the dynamics portion from thermodynamics, I think it is problematic. I just cannot de-couple this in this manner... To me, what you are actually calculating here is not dynamic vs. thermodynamic contributions, but rather the variability that can be accounted for using this categorization (i.e. this SOMA-based model) and the residual variability that cannot – and both the SOM and the residual contain both dynamic and thermodynamic contributions within them. That is, you do not have  $P'_{dyn}$  vs.  $P'_{the}$ , but rather more like  **$P'_{SOMA}$  vs.  $P'_{residual}$** . In this sense, there is nothing inherently wrong with what you did, just the way you interpreted it, and the dynamic vs. thermodynamic is a misnomer. But, perhaps I can be convinced otherwise.

Thank you very much for this comment/suggestion! We agree that dynamics and thermodynamics are not two independent processes, and precipitation corresponding to certain Z500/IVT pattern types have thermally related components. We have taken your suggestions and revised the decomposed terms from  $P'_{dyn} / P'_{the}$  to  $P'_{SOMA} / P'_{RES}$ . In addition, we added some texts in the method section to reflect this consideration.

Line 193-199: "It's worth noting that attempting to separate the actual dynamic and thermodynamic components solely through a circulation clustering approach like SOM can be

challenging. Each type of circulation, as represented by SOM nodes, inherently encompasses thermodynamic responses. Therefore, the distinction between "dynamic" and "thermodynamic" components can be ambiguous when using these terms. Consequently, we prefer to refer to the precipitation influenced by moist circulation patterns involving Z500 and IVT as  $P'_{\text{SOMA}}$  instead of  $P'_{\text{dyn}}$ . This emphasizes that our results regarding circulation contributions are contingent on our chosen set of circulation variables."

#### INDIVIDUAL COMMENTS:

Line 100-102: Need a bit of clarity here... the daily standardized anomaly is applied to the pentad moving average filter? Or the opposite? Or are these two things done separately?

Yes, we calculated the standardized anomaly after applying the 5-day moving average filter. We clarify this by revising Line 101-103: "To mitigate high-frequency synoptic noise, we employ a simple 5-day moving average filter to both Z500 and IVT. Subsequently, we calculate the daily standardized anomaly (Z500' and IVT') using the 5-day moving average-filtered data relative to the 1950-1999 climatology."

Line 102: Why 1950 to 1999 for the climo? Why not the entire period, or the most recent 30-year climate normal period? Or a period that ends in the present (2021)?

We added a sentence at Line 103-105 to explain the choice of climatology:

"We select the 1950-1999 period as the climatology reference to maximize the utilization of available data for this study; furthermore, this period, which predates the significant warming trend, typically serves as a robust baseline with less climate change impact."

Line 131: The way this is written is still slightly confusing in terms of how many dimensions you actually have here. It is a 2-dimensional data matrix with a size of 3782-by-26,280 (with perhaps a few leap-days in there), correct?

Thanks for pointing this out. We revise Line 132-133:

"Specifically for this study,  $N_{\text{lon}} = 61$ ,  $N_{\text{lat}} = 31$ , and  $N_t = 365 \text{ days/year} \times 72 \text{ years}$  (leap days removed for simplicity), so the input size is (3782, 26280)."

Line 160: While I am fine with the way you did this, just as a note, if trained using a batch process, then slightly different input vectors might be used and thus, result in different final clustering solutions, even with all the other 'settings' the same. So, you might want to run each node number multiple (10-20) times, and then average their QE, TE and CE.

Thank you very much for the comments. The SOM training was done with linear initialization so input vectors are fixed. In order to quantify the influence of initialization on the outcome, we adopt your suggestion and run each node number setting for an additional 100 times with random initialization setting, and plot their range in Fig. 1 (new Fig. 1 attached here). We still present the result from our original N=28 setting with linear initialization to facilitate replicability of the result.

Relevant texts are added and attached here as well:

Line 159-165: “During the initialization before the training, we employ the default setting, i.e., linear initialization, where weight vectors are initialized in a linear manner along the subspace defined by the two principal eigenvectors of the input dataset. This choice is made to facilitate the reproducibility of our results. While SOM is generally robust to initialization, slight variations in outcomes may occur when using random initialization, where the weight vectors are initialized with random small values. To assess the impact of initialization on SOM error metrics, we also conduct 100 additional SOM training with random initialization for each node number setting and analyze the range of their error metrics.”

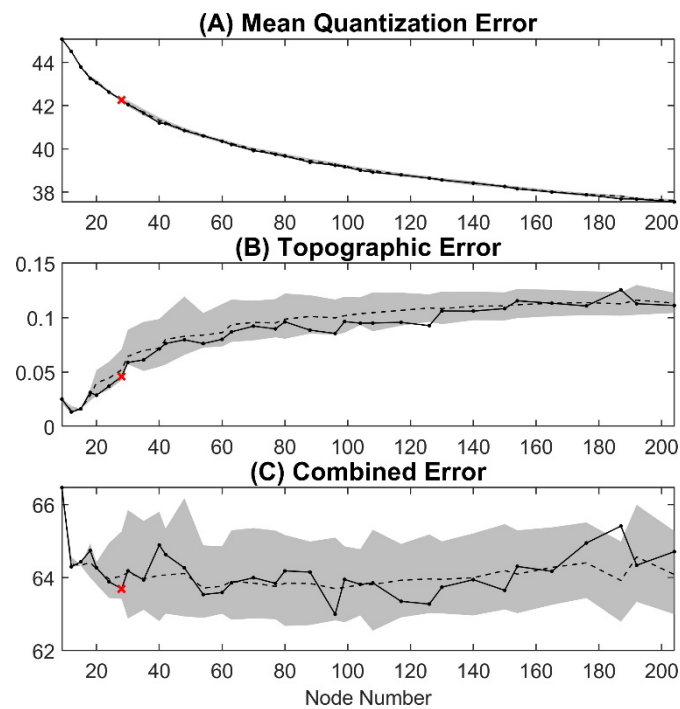

Figure 1: (A) Quantization error (QE), (B) topographic error (TE), and (C) combined error (CE) of SOM schemes with different node numbers ( $N$ ). The red cross denotes the one ( $N = 28$ ) we select in this study. Solid lines represent error of the SOM trained with linear initialization, while the shaded areas represent the range of errors within the middle 95% of the distribution from the 100 SOMs trained with random initialization for each node number setting, and dashed lines are their averages.

Figure 2: It would be nice if you could incorporate the seasonality of frequency of each atmospheric pattern into this graphic instead of having a separate figure 3.

Thanks for the suggestion. However, we found it very difficult to combine Figs. 2 and 3 without making it look visually busy. Instead, we added the mean frequency and seasonal frequency range numbers in each subplot of Fig. 2 (attached below) to somehow incorporate the frequency seasonality of each pattern. We kept Fig. 3 as it is to provide more detailed frequency information in addition to Fig. 2.

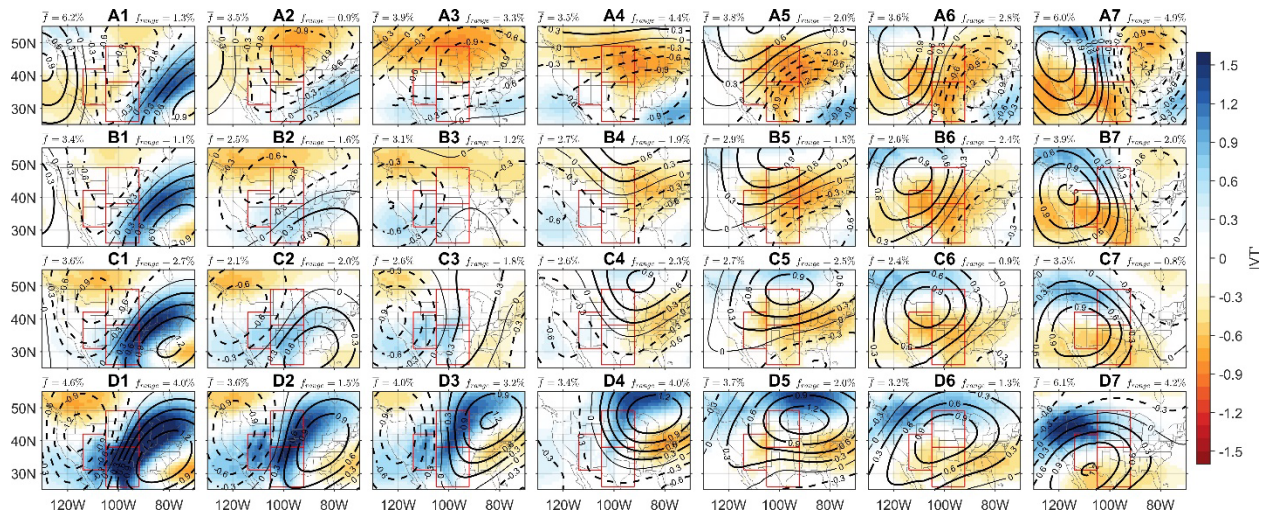

**Figure 2: Composite standardized Z500' (contours; solid and dashed lines are for positive and negative values, respectively) and standardized IVT' (shades) for each node in the 7x4 SOM. Mean frequency ( $\bar{f}$ ) and seasonality ( $f_{range}$ , i.e., difference between maximum and minimum seasonal frequencies as shown in Fig. 3, large value indicate stronger seasonal variation) of each node is labeled in each panel.**

Figure 3: I think the y-axis on these should be identical, so we can tell which ones are more/less frequent overall.

Thanks, same y-axis is used in the revised figure.

Figure 4: Again, I think the y-axis on these should all be identical.

Revised.

Line 226 and Figure 5: I rarely see CAPE and CIN in standardized values, but rather in their more-traditional units. I think you need to be careful here, as for example, a lower than average CAPE for a location that has pretty high average CAPE normally, might still mean that the atmosphere is pretty unstable. Also, are these values deseasonalized?

We agree that lower than average CAPE for a location/season could still mean a higher absolute CAPE value compared to other locations/seasons. We revise clarify this:

Line 264-270: “Additionally, the composite CAPE' and CINi' map for node D1 (Fig. S1) shows relatively smaller CAPE' and a more stable lower troposphere (negative CINi') compared to other nodes in the warm season (May to July), suppressing convective development thus limiting precipitation regardless of the strong moisture transport, whereas in the cold season (November to January), CAPE' and CINi' shows larger positive values associated with more precipitation compared to other nodes. However, it's important to note that the above comparison is within the same season, as node D1 in the warm season still corresponds to higher traditional CAPE and CINi values (not anomalies), as well as less total precipitation, compared to the cold season.”

And yes, these values are deseasonalized (climatology removed). Relevant texts are at:

Line 121-123: “Both CAPE and CINi data are processed the same way as circulation data to acquire their standardized anomalies (CAPE’ and CINi’) for further analyses.”

Line 230: D1 is perhaps suppressing convective development, but convective \*initiation\* (i.e. the ‘triggering lifting mechanism’) is as somewhat separate ingredient.

Thank you for pointing out this. We remove “initiation” and keep “development” in the revision (Line 266).

Line 235: the soil moisture thing comes out of no-where.... I don’t disagree, but, I do suggest a citation for this.

Thank you for pointing out this. We revise this to use “thermodynamic feedback” instead of “soil moisture feedback” to avoid confusion. A references is also added.

Line 272-275: “Overall, these seasonal fluctuations in the circulation-precipitation relationship can be attributed to factors influencing the types and mechanisms of precipitation, which can vary seasonally, such as atmospheric stability and thermodynamic feedback (Myoung and Nielsen-Gammon, 2010), or potential slight sampling bias in different seasons, as evidenced by the contrast between composite circulation maps for the same node in different seasons (Fig. S1).”

Line 274-275: I think you need to be careful with how this sentence is worded. I agree that the dynamic factors are likely the major contributors, but that statement is predicated upon how you specifically defined “dynamics” herein (with z500 and IVT SOMs). If you had chosen different variables to represent “dynamics” (e.g. SLP) would this statement still hold? Would the statement be weaker? Would it be stronger?

To address your major comment which is related to this comment as well, we change the use of “dynamic contribution” to “moist circulation contribution” (as suggested by the other reviewer) or “SOMA contribution”, in order to reflect that these statements are based on the circulation variables (Z500+IVT) we used.

To answer your other question about using other dynamic variables, we did find that using SLP instead of Z500 or Z500+IVT would yield a smaller percentage of explained variance. We briefly mentioned this in the first few sentences in the data section (attached below) but did not show a more detailed comparison for simplicity.

Line 90-93: “In previous studies related to SOM and analogue, large-scale circulation is generally represented by mean sea level pressure (SLP) or geopotential height at 500 hPa (Z500). Here, we choose Z500 over SLP as our experiments have demonstrated analogues derived from Z500 show greater similarity in synoptic variability with observed surface anomalies and yield smaller residuals compared to analogues derived from SLP (Zhuang et al., 2021b).”



Figure 8: Very interesting figure! I like it. However, why are the types color-coded the way they are? Is there a reason? It looks roughly like wet is green, and dry is red/orange/yellow, but is there a specific method for this?

Thank you. We added a sentence in the caption to explain this: “The colors of nodes are assigned in such a manner that adjacent nodes exhibit greater similarity in color compared to nodes that are farther apart.”, as well as a new panel to show the gradual change in colors across nodes (new Fig. 7 attached below).

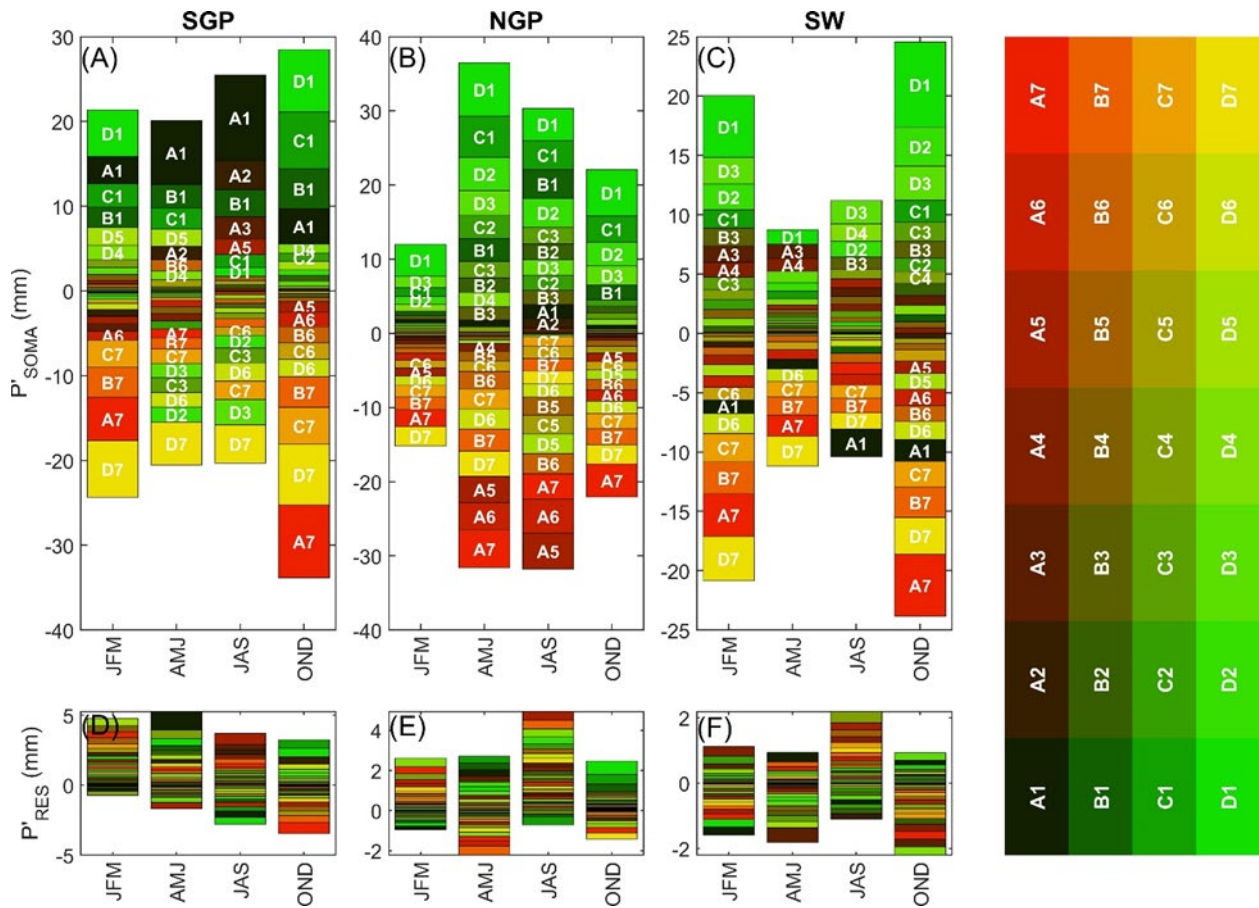

Figure 7: Average moist circulation contribution (SOMA; A-C) and residual (RES; D-F) to  $P'$  from each node in each three-month season (Jan-Mar, Apr-Jun, Jul-Sep, and Oct-Dec) over each region (SGP, NGP, SW). The colors of nodes are assigned in such a manner that adjacent nodes exhibit greater similarity in color compared to nodes that are farther apart.

Figure 9: Again, these subplots should have the same y-axis.

Same y-axis is applied to all subplots in the revision.

Line 314: “... larger or smaller than 90%...” - wouldn't that be ALL of them?

No, we mean when is larger than >90% of all (so smaller than <10% of them), or smaller than >90% of them (so larger than <10% of them).

We revise Line 356-359 to clarify this: “d) repeat step c) for many times (10000 here), if  $\Delta_{\text{PDO}}P'_{\text{SOMA}}(k,m)$  is larger than 90% of all simulated values, then for node  $k$  in month  $m$ ,  $P'_{\text{SOMA}}$  is significantly larger during positive PDO phase than negative phase; in contrast, if  $\Delta_{\text{PDO}}P'_{\text{SOMA}}(k,m)$  is smaller than 90% of all simulated values, then  $P'_{\text{SOMA}}$  is considered significantly smaller during positive PDO phase.”

Line 316: yes, but this is partly because PDO is not as often  $>0.5$  or  $<-0.5$  during these months, and thus, less sample size, right? And why the  $\pm 0.5$  thresholds... why not 1.0, or 0.25??

We added Line 361-369 to explain the choice of threshold.

“Additionally, the selection of a 0.5 threshold for PDO phases is mainly based on two considerations: 1) it has been commonly used in some prior studies (e.g., Hu and Guan 2018; Kiem 2003); 2) days or months categorized as positive or negative PDO phases using the 0.5 threshold constitute about 2/3 of the total samples (66.2%), striking a balance between inclusivity and specificity. Using a smaller threshold, such as 0.25, would result in a much higher percentage (81.8%) of samples categorized as positive or negative PDO-related, leading to results that are less representative of the true PDO impact due to overinclusiveness. Conversely, a larger threshold, like 1.0, would yield fewer (40.6%) samples; although it is still feasible, which could introduce greater sampling uncertainty due to limited data availability. Results obtained using the 1.0 threshold can be found in the supplementary materials (Figs. S2-S4) for reference; overall, the 0.5 and 1.0 thresholds produce slightly different results, but these differences do not impact our subsequent discussion.”

Line 321: Perhaps I am missing something here, but, just because these nodes have been found to be related to PDO, doesn't necessarily mean that this represents the “PDO-related dynamic contribution” to  $P'$  ... moreover the way that you have constructed this, makes it impossible for PDO to contribute MORE than the SOM-based dynamic component. That is, it could very well be that PDO is a more-dominant factor (more dominant than the SOM patterns), but this methodology would not allow for that. I think there is a better way to tease out how PDO is contributing to  $P'$  in these areas. At best, perhaps you can say that this is showing the combined contribution of the SOM-patterns that have been found to be most influenced by the PDO.

Also, who is to say that this represents PDO-only related contributions to  $P'$ ? What if you did this for AMO and AMO phases?? Or the IPO? In many ways, the SOM patterns you define are simply the regional-scale manifestation of hemispheric- to global-scale variability in the multiple internal climate oscillations occurring simultaneously (PDO/AMO/IPO/ENSO and that of all other teleconnections/oscillations at various periodicities).

Thank you for pointing out these limitations. And we agree that it would be impossible to disentangle the PDO contributions from various climate modes simply by using our current form of methodology. We added discussion about these limitations in the discussion section (attached below). Hope this can address your concerns.

Line 471-482: “Furthermore, the identified PDO-related SOM nodes and  $P'$  is likely also modulated by tropical SST variability. This is due to the well-established understanding that ENSO and PDO can generate similar atmospheric and oceanic anomaly patterns (e.g., Hu and Huang, 2009). Additionally, other internal climate variability modes, such as the Atlantic Multidecadal Oscillation (AMO; e.g., Hu et al., 2011), North Atlantic Oscillation (NAO; e.g., Whan and Zwiers, 2017), and Interdecadal Pacific Oscillation (IPO; e.g., Dai, 2013), can also influence these patterns. The SOM circulation patterns defined by Z500' and IVT' simply represent regional-scale manifestation of larger-scale variability simultaneously influenced by multiple internal climate modes. Attempting to isolate the individual contribution of these modes using statistical methods with limited data, such as SOM or SOMA, can be a complex challenge. Therefore, our results related to PDO contribution serves as a preliminary starting point which demonstrate the combined contribution of the SOM node patterns statistically linked to the PDO. To gain a more detail quantification of the PDO's influence excluding the effects of other climate variability modes, further research integrating both observational data and climate model output is needed.”
